# Supplementary material for: Effects of Astaxanthin from Shrimp Shell on Oxidative Stress and Behavior in Animal Model of Alzheimer’s Disease
Source: PubMed Central journal article supplement (PMC6891431; doi:10.3390/md17110628), 2019-11-04
Supplement: marinedrugs-17-00628-s001.pdf [file marinedrugs-17-00628-s001.pdf]

## Supplementary

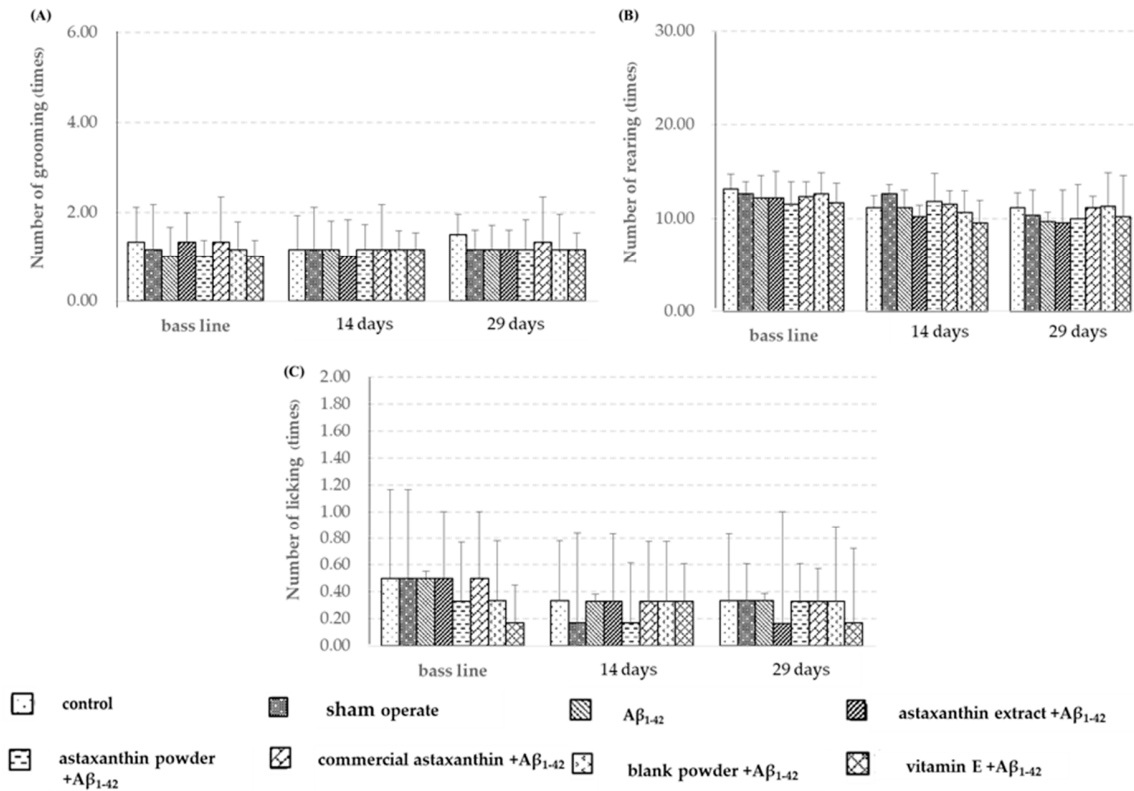

**Figure S1.** Effect of astaxanthin on spontaneous motor behaviors including grooming (A), rearing (B) and licking behaviors (C) in control rats (C), sham operate (SO): ACSF or vehicle plus  $A\beta_{1-42}$  treated group (V), vitamin E: 100 mg/kg BW plus  $A\beta_{1-42}$  treated group (VE), astaxanthin extract: 10 mg/kg BW plus  $A\beta_{1-42}$  treated group (AE), commercial astaxanthin: 10 mg/kg BW plus  $A\beta_{1-42}$  treated group (AC), astaxanthin powder: 10 mg/kg BW plus  $A\beta_{1-42}$  treated group (AP) and blank powder: 10 mg/kg BW plus  $A\beta_{1-42}$  treated group (BP).

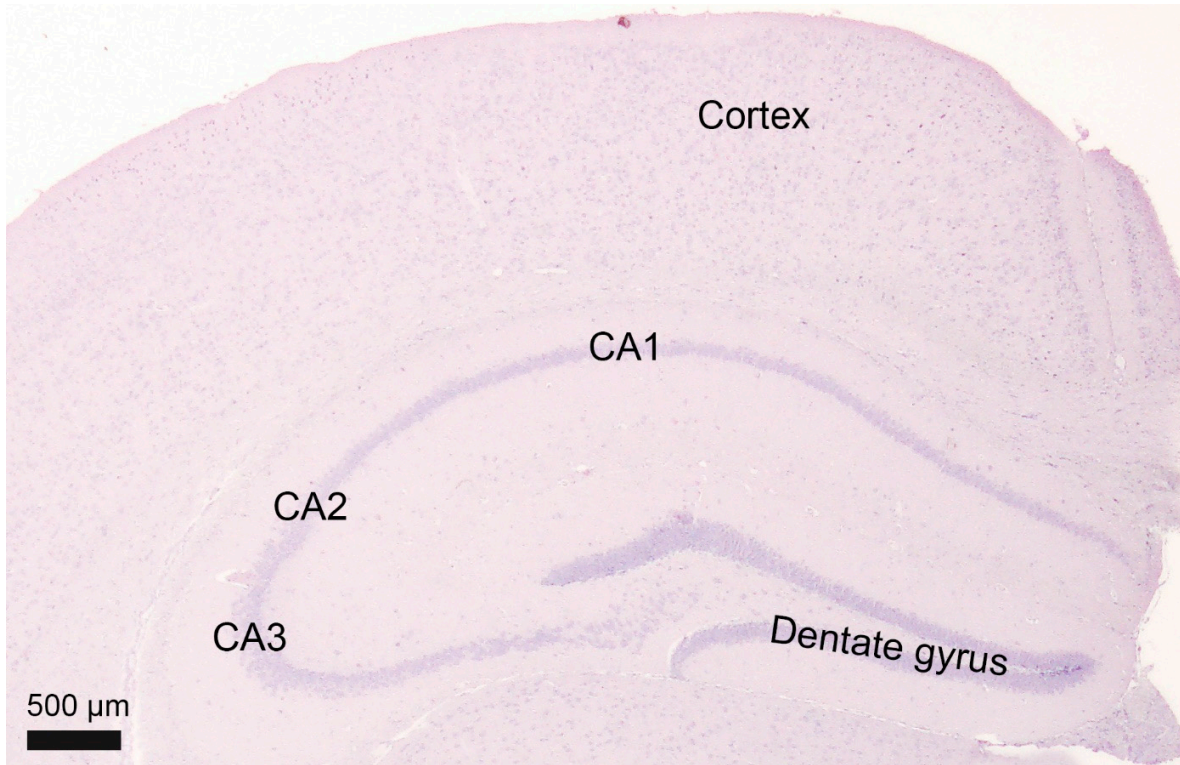

**Figure S2.** Hematoxylin staining of the paraffin-embedded right mouse brain demonstrates CA1, CA2, CA3, dentate gyrus, and cortex regions.

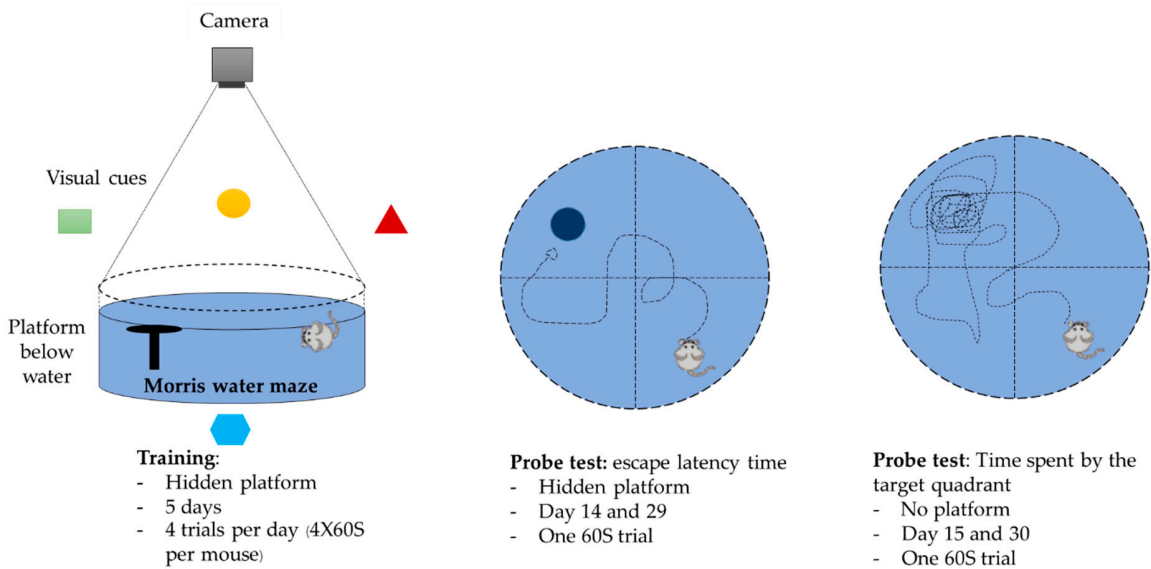

**Figure S3.** Schematic of Morris water maze test

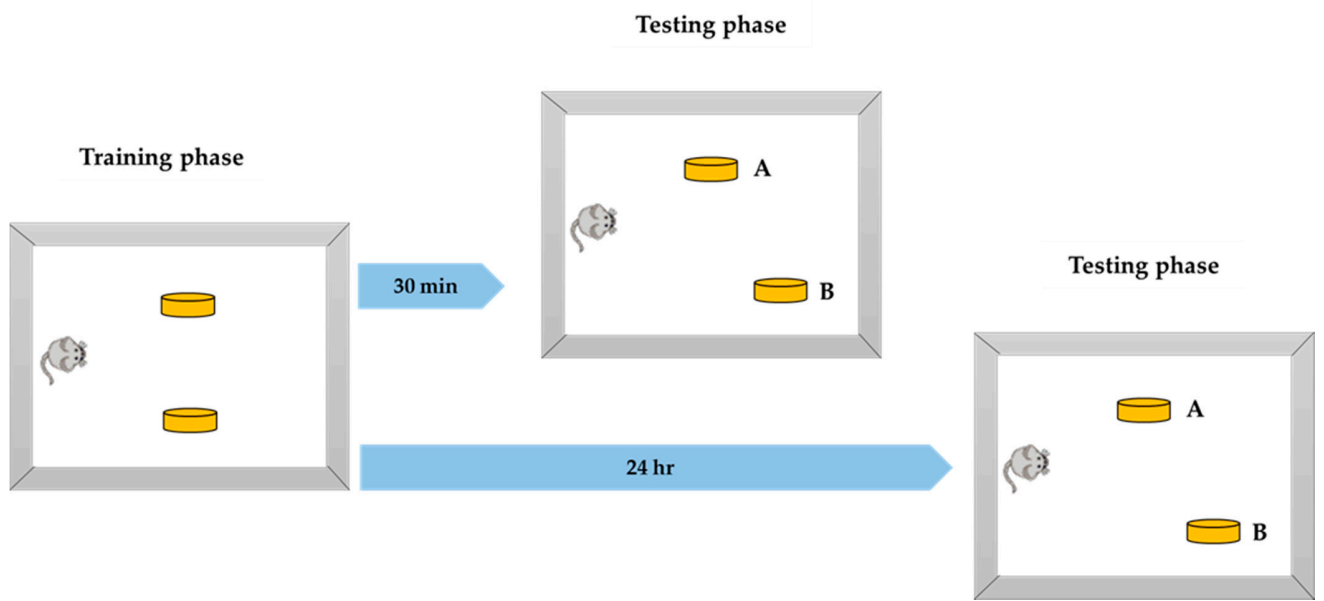

Figure S4. Schematic of object location test

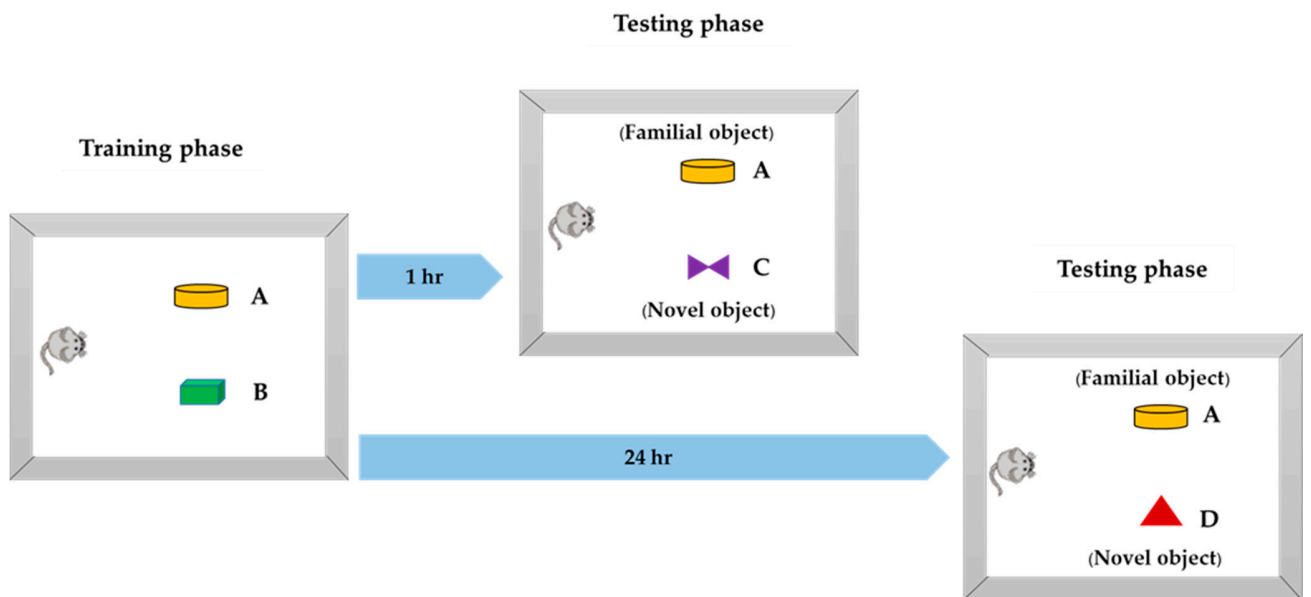

Figure S5. Schematic of object recognition test
